# Supplementary material for: Novel methods for the rapid and sensitive detection of Nipah virus based on a CRISPR/Cas12a system
Source: Royal Society of Chemistry journal article supplement (doi:10.1039/d4an00027g), 2024-01-01
Supplement: d4an00027g1.pdf [file d4an00027g1.pdf]

## Supplementary Information

### **Novel methods for the rapid and sensitive detection of Nipah virus based on CRISPR/Cas12a system**

Xi Yang, Kexin Xu, Siying Li, Jiangnian Zhang, Yinli Xie\*, Yongliang Lou\*, Xingxing Xiao\*.

\*Corresponding author: Yinli Xie, [xieyinli@wmu.edu.cn](mailto:xieyinli@wmu.edu.cn); Yongliang Lou, [lyl@wmu.edu.cn](mailto:lyl@wmu.edu.cn); Xingxing Xiao, [xiaoxingxing@wmu.edu.cn](mailto:xiaoxingxing@wmu.edu.cn).

## Supplementary Texts

### 1. Seven candidate primer pairs targeting the conserved regions of *N* gene.

F1/R1:

```
F1: *****
KY425646.1 ATGAGTGTATATCTTTGAAGAGGCGGCTAGT
KY425655.1 ATGAGTGTATATCTTTGAAGAGGCGGCTAGT
MK673563.1 ATGAGTGTATATCTTTGAAGAGGCGGCTAGT
MK673561.1 ATGAGTGTATATCTTTGAAGAGGCGGCTAGT
MK673560.1 ATGAGTGTATATCTTTGAAGAGGCGGCTAGT
MK673559.1 ATGAGTGTATATCTTTGAAGAGGCGGCTAGT
MK673558.1 ATGAGTGTATATCTTTGAAGAGGCGGCTAGT
KT163249.1 ATGAGTGTATATCTTTGAAGAGGCGGCTAGT
KT163248.1 ATGAGTGTATATCTTTGAAGAGGCGGCTAGT
JN808861.1 ATGAGTGTATATCTTTGAAGAGGCGGCTAGT
AY858110.1 ATGAGTGTATATCTTTGAAGAGGCGGCTAGT
MK673565.1 ATGAGTGTATATCTTTGAAGAGGCGGCTAGT
MK673590.1 ATGAGTGTATATCTTTGAAGAGGCGGCTAGT
MK673589.1 ATGAGTGTATATCTTTGAAGAGGCGGCTAGT
JN808857.1 ATGAGTGTATATCTTTGAAGAGGCGGCTAGT
MK673570.1 ATGAGTGTATATCTTTGAAGAGGCGGCTAGT
MK673564.1 ATGAGTGTATATCTTTGAAGAGGCGGCTAGT
AY988601.1 ATGAGTGTATATCTTTGAAGAGGCGGCTAGT
JN808864.1 ATGAGTGTATATCTTTGAAGAGGCGGCTAGT
MK673583.1 ATGAGTGTATATCTTTGAAGAGGCGGCTAGT
MK673578.1 ATGAGTGTATATCTTTGAAGAGGCGGCTAGT
MK673582.1 ATGAGTGTATATCTTTGAAGAGGCGGCTAGT
MK673577.1 ATGAGTGTATATCTTTGAAGAGGCGGCTAGT
KT163252.1 ATGAGTGTATATCTTTGAAGAGGCGGCTAGT
KT163255.1 ATGAGTGTATATCTTTGAAGAGGCGGCTAGT
KT163254.1 ATGAGTGTATATCTTTGAAGAGGCGGCTAGT
KT163251.1 ATGAGTGTATATCTTTGAAGAGGCGGCTAGT
KT163256.1 ATGAGTGTATATCTTTGAAGAGGCGGCTAGT
FJ513078.1 ATGAGTGTATATCTTTGAAGAGGCGGCTAGT
NC_002728.1 ATGAGTGTATATCTTTGAAGAGGCGGCTAGT
KT163250.1 ATGAGTGTATATCTTTGAAGAGGCGGCTAGT
KT163253.1 ATGAGTGTATATCTTTGAAGAGGCGGCTAGT
JN808858.1 ATGAGTGTATATCTTTGAAGAGGCGGCTAGT
JN808860.1 ATGAGTGTATATCTTTGAAGAGGCGGCTAGT
AY029768.1 ATGAGTGTATATCTTTGAAGAGGCGGCTAGT
AY029767.1 ATGAGTGTATATCTTTGAAGAGGCGGCTAGT
AJ627196.1 ATGAGTGTATATCTTTGAAGAGGCGGCTAGT
AJ564623.1 ATGAGTGTATATCTTTGAAGAGGCGGCTAGT
FN869553.1 ATGAGTGTATATCTTTGAAGAGGCGGCTAGT
AJ564622.1 ATGAGTGTATATCTTTGAAGAGGCGGCTAGT

R1: *****
KY425646.1 GAAGCTGTAATAATAGATGTTGGATCAATGGTCA
KY425655.1 GAAGCTGTAATAATAGATGTTGGATCAATGGTCA
MK673563.1 GAAGCTGTAATAATAGATGTTGGATCAATGGTCA
MK673561.1 GAAGCTGTAATAATAGATGTTGGATCAATGGTCA
MK673560.1 GAAGCTGTAATAATAGATGTTGGATCAATGGTCA
MK673559.1 GAAGCTGTAATAATAGATGTTGGATCAATGGTCA
MK673558.1 GAAGCTGTAATAATAGATGTTGGATCAATGGTCA
KT163249.1 GAAGCTGTAATAATAGATGTTGGATCAATGGTCA
KT163248.1 GAAGCTGTAATAATAGATGTTGGATCAATGGTCA
JN808861.1 GAAGCTGTAATAATAGATGTTGGATCAATGGTCA
AY858110.1 GAAGCTGTAATAATAGATGTTGGATCAATGGTCA
MK673565.1 GAAGCTGTAATAATAGATGTTGGATCAATGGTCA
MK673590.1 GAAGCTGTAATAATAGATGTTGGATCAATGGTCA
MK673589.1 GAAGCTGTAATAATAGATGTTGGATCAATGGTCA
JN808857.1 GAAGCTGTAATAATAGATGTTGGATCAATGGTCA
MK673570.1 GAAGCTGTAATAATAGATGTTGGATCAATGGTCA
MK673564.1 GAAGCTGTAATAATAGATGTTGGATCAATGGTCA
AY988601.1 GAAGCTGTAATAATAGATGTTGGATCAATGGTCA
JN808864.1 GAAGCTGTAATAATAGATGTTGGATCAATGGTCA
MK673583.1 GAAGCTGTAATAATAGATGTTGGATCAATGGTCA
MK673578.1 GAAGCTGTAATAATAGATGTTGGATCAATGGTCA
MK673582.1 GAAGCTGTAATAATAGATGTTGGATCAATGGTCA
MK673577.1 GAAGCTGTAATAATAGATGTTGGATCAATGGTCA
KT163252.1 GAAGCTGTAATAATAGATGTTGGATCAATGGTCA
KT163255.1 GAAGCTGTAATAATAGATGTTGGATCAATGGTCA
KT163254.1 GAAGCTGTAATAATAGATGTTGGATCAATGGTCA
KT163251.1 GAAGCTGTAATAATAGATGTTGGATCAATGGTCA
KT163256.1 GAAGCTGTAATAATAGATGTTGGATCAATGGTCA
FJ513078.1 GAAGCTGTAATAATAGATGTTGGATCAATGGTCA
NC_002728.1 GAAGCTGTAATAATAGATGTTGGATCAATGGTCA
KT163250.1 GAAGCTGTAATAATAGATGTTGGATCAATGGTCA
KT163253.1 GAAGCTGTAATAATAGATGTTGGATCAATGGTCA
JN808858.1 GAAGCTGTAATAATAGATGTTGGATCAATGGTCA
JN808860.1 GAAGCTGTAATAATAGATGTTGGATCAATGGTCA
AY029768.1 GAAGCTGTAATAATAGATGTTGGATCAATGGTCA
AY029767.1 GAAGCTGTAATAATAGATGTTGGATCAATGGTCA
AJ627196.1 GAAGCTGTAATAATAGATGTTGGATCAATGGTCA
AJ564623.1 GAAGCTGTAATAATAGATGTTGGATCAATGGTCA
FN869553.1 GAAGCTGTAATAATAGATGTTGGATCAATGGTCA
AJ564622.1 GAAGCTGTAATAATAGATGTTGGATCAATGGTCA
```

F2/R2:

F2: \*\*\*\*\*  
TAGGAGTTATCAATCTAAGTTAGGGAGAGATG  
KY425646.1 TAGGAGTTATCAATCTAAGTTAGGGAGAGATG  
KY425655.1 TAGGAGTTATCAATCTAAGTTAGGGAGAGATG  
MK673563.1 TAGGAGTTATCAATCTAAGTTAGGGAGAGATG  
MK673561.1 TAGGAGTTATCAATCTAAGTTAGGGAGAGATG  
MK673560.1 TAGGAGTTATCAATCTAAGTTAGGGAGAGATG  
MK673559.1 TAGGAGTTATCAATCTAAGTTAGGGAGAGATG  
MK673558.1 TAGGAGTTATCAATCTAAGTTAGGGAGAGATG  
KT163249.1 TAGGAGTTATCAATCTAAGTTAGGGAGAGATG  
KT163248.1 TAGGAGTTATCAATCTAAGTTAGGGAGAGATG  
JN808861.1 TAGGAGTTATCAATCTAAGTTAGGAAAGAGATG  
AY858110.1 TAGGAGTTATCAATCTAAGTTAGGGAGAGATG  
MK673565.1 TAGGAGTTATCAATCTAAGTTAGGAAAGAGATG  
MK673590.1 TAGGAGTTATCAATCTAAGTTAGGAAAGAGATG  
MK673589.1 TAGGAGTTATCAATCTAAGTTAGGAAAGAGATG  
JN808857.1 TAGGAGTTATCAATCTAAGTTAGGAAAGAGATG  
MK673570.1 TAGGAGTTATCAATCTAAGTTAGGAAAGAGATG  
MK673564.1 TAGGAGTTATCAATCTAAGTTAGGAAAGAGATG  
AY988601.1 TAGGAGTTATCAATCTAAGTTAGGAAAGAGATG  
JN808864.1 TAGGAGTTATCAATCTAAGTTAGGAAAGAGATG  
MK673583.1 TAGGAGTTATCAATCTAAGTTAGGAAAGAGATG  
MK673578.1 TAGGAGTTATCAATCTAAGTTAGGAAAGAGATG  
MK673582.1 TAGGAGTTATCAATCTAAGTTAGGAAAGAGATG  
MK673577.1 TAGGAGTTATCAATCTAAGTTAGGAAAGAGATG  
KT163252.1 TAGGAGTTATCAATCTAAGTTAGGAAAGAGATG  
KT163255.1 TAGGAGTTATCAATCTAAGTTAGGAAAGAGATG  
KT163254.1 TAGGAGTTATCAATCTAAGTTAGGAAAGAGATG  
KT163251.1 TAGGAGTTATCAATCTAAGTTAGGAAAGAGATG  
KT163256.1 TAGGAGTTATCAATCTAAGTTAGGAAAGAGATG  
FJ513078.1 TAGGAGTTATCAATCTAAGTTAGGAAAGAGATG  
NC\_002728.1 TAGGAGTTATCAATCTAAGTTAGGGAGAGATG  
KT163250.1 TAGGAGTTATCAATCTAAGTTAGGGAGAGATG  
KT163253.1 TAGGAGTTATCAATCTAAGTTAGGAAAGAGATG  
JN808858.1 TAGGAGTTATCAATCTAAGTTAGGAAAGAGATG  
JN808860.1 TAGGAGTTATCAATCTAAGTTAGGGAGAGATG  
AY029768.1 TAGGAGTTATCAATCTAAGTTAGGGAGAGATG  
AY029767.1 TAGGAGTTATCAATCTAAGTTAGGGAGAGATG  
AJ627196.1 TAGGAGTTATCAATCTAAGTTAGGGAGAGATG  
AJ564623.1 TAGGAGTTATCAATCTAAGTTAGGGAGAGATG  
FN869553.1 TAGGAGTTATCAATCTAAGTTAGGGAGAGATG  
AJ564622.1 TAGGAGTTATCAATCTAAGTTAGGGAGAGATG

R2: \*\*\*\*\*  
GAAGCTGTAATAATAGATGTTGGATCAATGGT  
KY425646.1 GAAGCTGTAATAATAGATGTTGGATCAATGGT  
KY425655.1 GAAGCTGTAATAATAGATGTTGGATCAATGGT  
MK673563.1 GAAGCTGTAATAATAGATGTTGGATCAATGGT  
MK673561.1 GAAGCTGTAATAATAGATGTTGGATCAATGGT  
MK673560.1 GAAGCTGTAATAATAGATGTTGGATCAATGGT  
MK673559.1 GAAGCTGTAATAATAGATGTTGGATCAATGGT  
MK673558.1 GAAGCTGTAATAATAGATGTTGGATCAATGGT  
KT163249.1 GAAGCTGTAATAATAGATGTTGGATCAATGGT  
KT163248.1 GAAGCTGTAATAATAGATGTTGGATCAATGGT  
JN808861.1 GAAGCTGTAATAATAGATGTTGGATCAATGGT  
AY858110.1 GAAGCTGTAATAATAGATGTTGGATCAATGGT  
MK673565.1 GAAGCTGTAATAATAGATGTTGGATCAATGGT  
MK673590.1 GAAGCTGTAATAATAGATGTTGGATCAATGGT  
MK673589.1 GAAGCTGTAATAATAGATGTTGGATCAATGGT  
JN808857.1 GAAGCTGTAATAATAGATGTTGGATCAATGGT  
MK673570.1 GAAGCTGTAATAATAGATGTTGGATCAATGGT  
MK673564.1 GAAGCTGTAATAATAGATGTTGGATCAATGGT  
AY988601.1 GAAGCTGTAATAATAGATGTTGGATCAATGGT  
JN808864.1 GAAGCTGTAATAATAGATGTTGGATCAATGGT  
MK673583.1 GAAGCTGTAATAATAGATGTTGGATCAATGGT  
MK673578.1 GAAGCTGTAATAATAGATGTTGGATCAATGGT  
MK673582.1 GAAGCTGTAATAATAGATGTTGGATCAATGGT  
MK673577.1 GAAGCTGTAATAATAGATGTTGGTCAATGGT  
KT163252.1 GAAGCTGTAATAATAGACGTTGGATCAATGGT  
KT163255.1 GAAGCTGTAATAATAGACGTTGGATCAATGGT  
KT163254.1 GAAGCTGTAATAATAGACGTTGGATCAATGGT  
KT163251.1 GAAGCTGTAATAATAGACGTTGGATCAATGGT  
KT163256.1 GAAGCTGTAATAATAGACGTTGGATCAATGGT  
FJ513078.1 GAAGCTGTAATAATAGATGTTGGATCAATGGT  
NC\_002728.1 GAAGCTGTAATAATAGATGTTGGATCAATGGT  
KT163250.1 GAAGCTGTAATAATAGATGTTGGATCAATGGT  
KT163253.1 GAAGCTGTAATAATAGACGTTGGATCAATGGT  
JN808858.1 GAAGCTGTAATAATAGATGTTGGATCAATGGT  
JN808860.1 GAAGCTGTAATAATAGATGTTGGATCAATGGT  
AY029768.1 GAAGCTGTAATAATAGATGTTGGATCAATGGT  
AY029767.1 GAAGCTGTAATAATAGATGTTGGATCAATGGT  
AJ627196.1 GAAGCTGTAATAATAGATGTTGGATCAATGGT  
AJ564623.1 GAAGCTGTAATAATAGATGTTGGATCAATGGT  
FN869553.1 GAAGCTGTAATAATAGATGTTGGATCAATGGT  
AJ564622.1 GAAGCTGTAATAATAGATGTTGGATCAATGGT



F3/R3:

**F3:** \*\*\*\*\*  
GGAGTTATCAATCTAAGTTAGGGAGAGATG  
KY425646.1 GGAGTTATCAATCTAAGTTAGGGAGAGATG  
KY425655.1 GGAGTTATCAATCTAAGTTAGGGAGAGATG  
MK673563.1 GGAGTTATCAATCTAAGTTAGGGAGAGATG  
MK673561.1 GGAGTTATCAATCTAAGTTAGGGAGAGATG  
MK673560.1 GGAGTTATCAATCTAAGTTAGGGAGAGATG  
MK673559.1 GGAGTTATCAATCTAAGTTAGGGAGAGATG  
MK673558.1 GGAGTTATCAATCTAAGTTAGGGAGAGATG  
KT163249.1 GGAGTTATCAATCTAAGTTAGGGAGAGATG  
KT163248.1 GGAGTTATCAATCTAAGTTAGGGAGAGATG  
JN808861.1 GGAGTTATCAATCTAAGTTAGGGAGAGATG  
AY858110.1 GGAGTTATCAATCTAAGTTAGGGAGAGATG  
MK673565.1 GGAGTTATCAATCTAAGTTAGGGAGAGATG  
MK673590.1 GGAGTTATCAATCTAAGTTAGGGAGAGATG  
MK673589.1 GGAGTTATCAATCTAAGTTAGGGAGAGATG  
JN808857.1 GGAGTTATCAATCTAAGTTAGGGAGAGATG  
MK673570.1 GGAGTTATCAATCTAAGTTAGGGAGAGATG  
MK673564.1 GGAGTTATCAATCTAAGTTAGGGAGAGATG  
AY988601.1 GGAGTTATCAATCTAAGTTAGGGAGAGATG  
JN808864.1 GGAGTTATCAATCTAAGTTAGGGAGAGATG  
MK673583.1 GGAGTTATCAATCTAAGTTAGGGAGAGATG  
MK673578.1 GGAGTTATCAATCTAAGTTAGGGAGAGATG  
MK673582.1 GGAGTTATCAATCTAAGTTAGGGAGAGATG  
MK673577.1 GGAGTTATCAATCTAAGTTAGGGAGAGATG  
KT163252.1 GGAGTTATCAATCTAAGTTAGGGAGAGATG  
KT163255.1 GGAGTTATCAATCTAAGTTAGGGAGAGATG  
KT163254.1 GGAGTTATCAATCTAAGTTAGGGAGAGATG  
KT163251.1 GGAGTTATCAATCTAAGTTAGGGAGAGATG  
KT163256.1 GGAGTTATCAATCTAAGTTAGGGAGAGATG  
FJ513078.1 GGAGTTATCAATCTAAGTTAGGGAGAGATG  
NC\_002728.1 GGAGTTATCAATCTAAGTTAGGGAGAGATG  
KT163250.1 GGAGTTATCAATCTAAGTTAGGGAGAGATG  
KT163253.1 GGAGTTATCAATCTAAGTTAGGGAGAGATG  
JN808858.1 GGAGTTATCAATCTAAGTTAGGGAGAGATG  
JN808860.1 GGAGTTATCAATCTAAGTTAGGGAGAGATG  
AY029768.1 GGAGTTATCAATCTAAGTTAGGGAGAGATG  
AY029767.1 GGAGTTATCAATCTAAGTTAGGGAGAGATG  
AJ627196.1 GGAGTTATCAATCTAAGTTAGGGAGAGATG  
AJ564623.1 GGAGTTATCAATCTAAGTTAGGGAGAGATG  
FN869553.1 GGAGTTATCAATCTAAGTTAGGGAGAGATG  
AJ564622.1 GGAGTTATCAATCTAAGTTAGGGAGAGATG

**R3:** \*\*\*\*  
CTTTCACACTCATCTCTATGTATTCAGAGA  
KY425646.1 CTTTCACACTCATCTCTATGTATTCAGAGA  
KY425655.1 CTTTCACACTCATCTCTATGTATTCAGAGA  
MK673563.1 CTTTCACACTCATCTCTATGTATTCAGAGA  
MK673561.1 CTTTCACACTCATCTCTATGTATTCAGAGA  
MK673560.1 CTTTCACACTCATCTCTATGTATTCAGAGA  
MK673559.1 CTTTCACACTCATCTCTATGTATTCAGAGA  
MK673558.1 CTTTCACACTCATCTCTATGTATTCAGAGA  
KT163249.1 CTTTCACACTCATCTCTATGTATTCAGAGA  
KT163248.1 CTTTCACACTCATCTCTATGTATTCAGAGA  
JN808861.1 CTTTTCACACTCATCTCTATGTATTCAGAGA  
AY858110.1 CTTTTCACACTCATCTCTATGTATTCAGAGA  
MK673565.1 CTTTTCACACTCATCTCTATGTATTCAGAGA  
MK673590.1 CTTTTCACACTCATCTCTATGTATTCAGAGA  
MK673589.1 CTTTTCACACTCATCTCTATGTATTCAGAGA  
JN808857.1 CTTTTCACACTCATCTCTATGTATTCAGAGA  
MK673570.1 CTTTTCACACTCATCTCTATGTATTCAGAGA  
MK673564.1 CTTTTCACACTCATCTCTATGTATTCAGAGA  
AY988601.1 CTTTTCACACTCATCTCTATGTATTCAGAGA  
JN808864.1 CTTTTCACACTCATCTCTATGTATTCAGAGA  
MK673583.1 CTTTTCACACTCATCTCTATGTATTCAGAGA  
MK673578.1 CTTTTCACACTCATCTCTATGTATTCAGAGA  
MK673582.1 CTTTTCACACTCATCTCTATGTATTCAGAGA  
MK673577.1 CTTTTCACACTCATCTCTATGTATTCAGAGA  
KT163252.1 CTTTTCACACTCATCTCTATGTATTCAGAGA  
KT163255.1 CTTTTCACACTCATCTCTATGTATTCAGAGA  
KT163254.1 CTTTTCACACTCATCTCTATGTATTCAGAGA  
KT163251.1 CTTTTCACACTCATCTCTATGTATTCAGAGA  
KT163256.1 CTTTTCACACTCATCTCTATGTATTCAGAGA  
FJ513078.1 CTTTTCACACTCATCTCTATGTATTCAGAGA  
NC\_002728.1 CTTTTCACACTCATCTCTATGTATTCAGAGA  
KT163250.1 CTTTTCACACTCATCTCTATGTATTCAGAGA  
KT163253.1 CTTTTCACACTCATCTCTATGTATTCAGAGA  
JN808858.1 CTTTTCACACTCATCTCTATGTATTCAGAGA  
JN808860.1 CTTTTCACACTCATCTCTATGTATTCAGAGA  
AY029768.1 CTTTTCACACTCATCTCTATGTATTCAGAGA  
AY029767.1 CTTTTCACACTCATCTCTATGTATTCAGAGA  
AJ627196.1 CTTTTCACACTCATCTCTATGTATTCAGAGA  
AJ564623.1 CTTTTCACACTCATCTCTATGTATTCAGAGA  
FN869553.1 CTTTTCACACTCATCTCTATGTATTCAGAGA  
AJ564622.1 CTTTTCACACTCATCTCTATGTATTCAGAGA





F5/R5:

**F5:** \*\*\*\* \*  
GAGGAATTGATCAGAACATGGCAAATAGAC  
KY425646.1 GAGGAATTGATCAGAACATGGCAAATAGAC  
KY425655.1 GAGGAATTGATCAGAACATGGCAAATAGAC  
MK673563.1 GAGGAATTGATCAGAACATGGCAAATAGAC  
MK673561.1 GAGGAATTGATCAGAACATGGCAAATAGAC  
MK673560.1 GAGGAATTGATCAGAACATGGCAAATAGAC  
MK673559.1 GAGGAATTGATCAGAACATGGCAAATAGAC  
MK673558.1 GAGGAATTGATCAGAACATGGCAAATAGAC  
KT163249.1 GAGGAATTGATCAGAACATGGCAAATAGAC  
KT163248.1 GAGGAATTGATCAGAACATGGCAAATAGAC  
JN808861.1 GAGGAATTGATCAGAACATGGCAAATAGAC  
AY858110.1 GAGGAATTGATCAGAACATGGCAAATAGAC  
MK673565.1 GAGGAATTGATCAGAACATGGCAAATAGAC  
MK673590.1 GAGGAATTGATCAGAACATGGCAAATAGAC  
MK673589.1 GAGGAATTGATCAGAACATGGCAAATAGAC  
JN808857.1 GAGGAATTGATCAGAACATGGCAAATAGAC  
MK673570.1 GAGGAATTGATCAGAACATGGCAAATAGAC  
MK673564.1 GAGGAATTGATCAGAACATGGCAAATAGAC  
AY988601.1 GAGGAATTGATCAGAACATGGCAAATAGAC  
JN808864.1 GAGGAATTGATCAGAACATGGCAAATAGAC  
MK673583.1 GAGGAATTGATCAGAACATGGCAAATAGAC  
MK673578.1 GAGGAATTGATCAGAACATGGCAAATAGAC  
MK673582.1 GAGGAATTGATCAGAACATGGCAAATAGAC  
MK673577.1 GAGGAATTGATCAGAACATGGCAAATAGAC  
KT163252.1 GAGGAATTGATCAGAACATGGCAAATAGAC  
KT163255.1 GAGGAATTGATCAGAACATGGCAAATAGAC  
KT163254.1 GAGGAATTGATCAGAACATGGCAAATAGAC  
KT163251.1 GAGGAATTGATCAGAACATGGCAAATAGAC  
KT163256.1 GAGGAATTGATCAGAACATGGCAAATAGAC  
FJ513078.1 GAGGAATTGATCAGAACATGGCAAATAGAC  
NC\_002728.1 GAGGAATTGATCAGAACATGGCAAATAGAC  
KT163250.1 GAGGAATTGATCAGAACATGGCAAATAGAC  
KT163253.1 GAGGAATTGATCAGAACATGGCAAATAGAC  
JN808858.1 GAGGAATTGATCAGAACATGGCAAATAGAC  
JN808860.1 GAGGAATTGATCAGAACATGGCAAATAGAC  
AY029768.1 GAGGAATTGATCAGAACATGGCAAATAGAC  
AY029767.1 GAGGAATTGATCAGAACATGGCAAATAGAC  
AJ627196.1 GAGGAATTGATCAGAACATGGCAAATAGAC  
AJ564623.1 GAGGAATTGATCAGAACATGGCAAATAGAC  
FN869553.1 GAGGAATTGATCAGAACATGGCAAATAGAC  
AJ564622.1 GAGGAATTGATCAGAACATGGCAAATAGAC

**R5:** \*\*\*\*\*  
GTTACCTTCAAAAAGGGAGATGAGTATTTCA  
KY425646.1 GTTACCTTCAAAAAGGGAGATGAGTATTTCA  
KY425655.1 GTTACCTTCAAAAAGGGAGATGAGTATTTCA  
MK673563.1 GTTACCTTCAAAAAGGGAGATGAGTATTTCA  
MK673561.1 GTTACCTTCAAAAAGGGAGATGAGTATTTCA  
MK673560.1 GTTACCTTCAAAAAGGGAGATGAGTATTTCA  
MK673559.1 GTTACCTTCAAAAAGGGAGATGAGTATTTCA  
MK673558.1 GTTACCTTCAAAAAGGGAGATGAGTATTTCA  
KT163249.1 GTTACCTTCAAAAAGGGAGATGAGTATTTCA  
KT163248.1 GTTACCTTCAAAAAGGGAGATGAGTATTTCA  
JN808861.1 GTTACCTTCAAAAAGGGAGATGAGTATTTCA  
AY858110.1 GTTACCTTCAAAAAGGGAGATGAGTATTTCA  
MK673565.1 GTTACCTTCAAAAAGGGAGATGAGTATTTCA  
MK673590.1 GTTACCTTCAAAAAGGGAGATGAGTATTTCA  
MK673589.1 GTTACCTTCAAAAAGGGAGATGAGTATTTCA  
JN808857.1 GTTACCTTCAAAAAGGGAGATGAGTATTTCA  
MK673570.1 GTTACCTTCAAAAAGGGAGATGAGTATTTCA  
MK673564.1 GTTACCTTCAAAAAGGGAGATGAGTATTTCA  
AY988601.1 GTTACCTTCAAAAAGGGAGATGAGTATTTCA  
JN808864.1 GTTACCTTCAAAAAGGGAGATGAGTATTTCA  
MK673583.1 GTTACCTTCAAAAAGGGAGATGAGTATTTCA  
MK673578.1 GTTACCTTCAAAAAGGGAGATGAGTATTTCA  
MK673582.1 GTTACCTTCAAAAAGGGAGATGAGTATTTCA  
MK673577.1 GTTACCTTCAAAAAGGGAGATGAGTATTTCA  
KT163252.1 GTTACCTTCAAAAAGGGAGATGAGTATTTCA  
KT163255.1 GTTACCTTCAAAAAGGGAGATGAGTATTTCA  
KT163254.1 GTTACCTTCAAAAAGGGAGATGAGTATTTCA  
KT163251.1 GTTACCTTCAAAAAGGGAGATGAGTATTTCA  
KT163256.1 GTTACCTTCAAAAAGGGAGATGAGTATTTCA  
FJ513078.1 GTTACCTTCAAAAAGGGAGATGAGTATTTCA  
NC\_002728.1 GTTACCTTCAAAAAGGGAGATGAGTATTTCA  
KT163250.1 GTTACCTTCAAAAAGGGAGATGAGTATTTCA  
KT163253.1 GTTACCTTCAAAAAGGGAGATGAGTATTTCA  
JN808858.1 GTTACCTTCAAAAAGGGAGATGAGTATTTCA  
JN808860.1 GTTACCTTCAAAAAGGGAGATGAGTATTTCA  
AY029768.1 GTTACCTTCAAAAAGGGAGATGAGTATTTCA  
AY029767.1 GTTACCTTCAAAAAGGGAGATGAGTATTTCA  
AJ627196.1 GTTACCTTCAAAAAGGGAGATGAGTATTTCA  
AJ564623.1 GTTACCTTCAAAAAGGGAGATGAGTATTTCA  
FN869553.1 GTTACCTTCAAAAAGGGAGATGAGTATTTCA  
AJ564622.1 GTTACCTTCAAAAAGGGAGATGAGTATTTCA

F6/R6:

F6: \*\* \*\*\*\*\* \*\*\*\*\* \*\*\*\*\* \*\*  
GAAAGTGAAC TAGAAGATGGGCTAAATAC  
KY425646.1 GAAAGTGAAC TAGAAGATGGGCTAAATAC  
KY425655.1 GAAAGTGAAC TAGAAGATGGGCTAAATAC  
MK673563.1 GAAAGTGAAC TAGAAGATGGGCTAAATAC  
MK673561.1 GAAAGTGAAC TAGAAGATGGGCTAAATAC  
MK673560.1 GAAAGTGAAC TAGAAGATGGGCTAAATAC  
MK673559.1 GAAAGTGAAC TAGAAGATGGGCTAAATAC  
MK673558.1 GAAAGTGAAC TAGAAGATGGGCTAAATAC  
KT163249.1 GAAAGTGAAC TAGAAGATGGGCTAAATAC  
KT163248.1 GAAAGTGAAC TAGAAGATGGGCTAAATAC  
JN808861.1 GAGAGTGAAC TAGAAGATGGGCTAAGTAC  
AY858110.1 GAAAGTGAAC TAGAAGATGGGCTAAATAC  
MK673565.1 GAGAGTGAAC TAGAAGATGGGCTAAGTAC  
MK673590.1 GAGAGTGAAC TAGAAGATGGGCTAAGTAC  
MK673589.1 GAGAGTGAAC TAGAAGATGGGCTAAGTAC  
JN808857.1 GAGAGTGAAC TAGAAGATGGGCTAAGTAC  
MK673570.1 GAGAGTGAAC TAGAAGATGGGCTAAGTAC  
MK673564.1 GATAGTGAAC TAGAAGATGGGCTAAGTAC  
AY988601.1 GATAGTGAAC TAGAAGATGGGCTAAGTAC  
JN808864.1 GAGAGTGAAC TAGAAGATGGGCTAAGTAC  
MK673583.1 GAGAGTGAAC TAGAAGATGGGCTAAGTAC  
MK673578.1 GAGAGTGAAC TAGAAGATGGGCTAAGTAC  
MK673582.1 GAGAGTGAAC TAGAAGATGGGCTAAGTAC  
MK673577.1 GAGAGTGAAC TAGAAGATGGGCTAAGTAC  
KT163252.1 GAGAGTGAAC TAGAAGATGGGCTAAGTAC  
KT163255.1 GAGAGTGAAC TAGAAGATGGGCTAAGTAC  
KT163254.1 GAGAGTGAAC TAGAAGATGGGCTAAGTAC  
KT163251.1 GAGAGTGAAC TAGAAGATGGGCTAAGTAC  
KT163256.1 GAGAGTGAAC TAGAAGATGGGCTAAGTAC  
FJ513078.1 GAGAGTGAAC TAGAAGATGGGCTAAGTAC  
NC\_002728.1 GAAAGTGAAC TAGAAGATGGGCTAAATAC  
KT163250.1 GAAAGTGAAC TAGAAGATGGGCTAAATAC  
KT163253.1 GAGAGTGAAC TAGAAGATGGGCTAAGTAC  
JN808858.1 GAGAGTGAAC TAGAAGATGGGCTAAGTAC  
JN808860.1 GAGAGTGAAC TAGAAGATGGGCTAAGTAC  
AY029768.1 GAAAGTGAAC TAGAAGATGGGCTAAATAC  
AY029767.1 GAAAGTGAAC TAGAAGATGGGCTAAATAC  
AJ627196.1 GAAAGTGAAC TAGAAGATGGGCTAAATAC  
AJ564623.1 GAAAGTGAAC TAGAAGATGGGCTAAATAC  
FN869553.1 GAAAGTGAAC TAGAAGATGGGCTAAATAC  
AJ564622.1 GAAAGTGAAC TAGAAGATGGGCTAAATAC

R6: \*\*\* \*\*\*\*\* \*\*\*\*\* \*\*\*\*\*  
AGTAGAAATAATCTCAGACATCGGAAACTA  
KY425646.1 AGTAGAAATAATCTCAGACATCGGAAACTA  
KY425655.1 AGTAGAAATAATCTCAGACATCGGAAACTA  
MK673563.1 AGTAGAAATAATCTCAGACATCGGAAACTA  
MK673561.1 AGTAGAAATAATCTCAGACATCGGAAACTA  
MK673560.1 AGTAGAAATAATCTCAGACATCGGAAACTA  
MK673559.1 AGTAGAAATAATCTCAGACATCGGAAACTA  
MK673558.1 AGTAGAAATAATCTCAGACATCGGAAACTA  
KT163249.1 AGTAGAAATAATCTCAGACATCGGAAACTA  
KT163248.1 AGTAGAAATAATCTCAGACATCGGAAACTA  
JN808861.1 AGTGGAAATAATCTCAGACATCGGAAACTA  
AY858110.1 AGTAGAAATAATCTCAGACATCGGAAACTA  
MK673565.1 AGTGGAAATAATCTCAGACATCGGAAACTA  
MK673590.1 AGTGGAAATAATCTCAGACATCGGAAACTA  
MK673589.1 AGTGGAAATAATCTCAGACATCGGAAACTA  
JN808857.1 AGTGGAAATAATCTCAGACATCGGAAACTA  
MK673570.1 AGTGGAAATAATCTCAGACATCGGAAACTA  
MK673564.1 AGTGGAAATAATCTCAGACATCGGAAACTA  
AY988601.1 AGTGGAAATAATCTCAGACATCGGAAACTA  
JN808864.1 AGTGGAAATAATCTCAGACATCGGAAACTA  
MK673583.1 AGTGGAAATAATCTCAGACATCGGAAACTA  
MK673578.1 AGTGGAAATAATCTCAGACATCGGAAACTA  
MK673582.1 AGTGGAAATAATCTCAGACATCGGAAACTA  
MK673577.1 AGTGGAAATAATCTCAGACATCGGAAACTA  
KT163252.1 AGTGGAAATAATCTCAGACATCGGAAACTA  
KT163255.1 AGTGGAAATAATCTCAGACATCGGAAACTA  
KT163254.1 AGTGGAAATAATCTCAGACATCGGAAACTA  
KT163251.1 AGTGGAAATAATCTCAGACATCGGAAACTA  
KT163256.1 AGTGGAAATAATCTCAGACATCGGAAACTA  
FJ513078.1 AGTGGAAATAATCTCAGACATCGGAAACTA  
NC\_002728.1 AGTAGAAATAATCTCAGACATCGGAAACTA  
KT163250.1 AGTAGAAATAATCTCAGACATCGGAAACTA  
KT163253.1 AGTGGAAATAATCTCAGACATCGGAAACTA  
JN808858.1 AGTGGAAATAATCTCAGACATCGGAAACTA  
JN808860.1 AGTGGAAATAATCTCAGACATCGGAAACTA  
AY029768.1 AGTAGAAATAATCTCAGACATCGGAAACTA  
AY029767.1 AGTAGAAATAATCTCAGACATCGGAAACTA  
AJ627196.1 AGTAGAAATAATCTCAGACATCGGAAACTA  
AJ564623.1 AGTAGAAATAATCTCAGACATCGGAAACTA  
FN869553.1 AGTAGAAATAATCTCAGACATCGGAAACTA  
AJ564622.1 AGTAGAAATAATCTCAGACATCGGAAACTA



F7/R7:

F7: \*\*\* \*\*\*\*\* \*\*\*\*\* \*\*\*\*\* \*\*  
GGAAAGTGAAACTAGAAGATGGGCTAAATAC  
KY425646.1 GGAAAGTGAAACTAGAAGATGGGCTAAATAC  
KY425655.1 GGAAAGTGAAACTAGAAGATGGGCTAAATAC  
MK673563.1 GGAAAGTGAAACTAGAAGATGGGCTAAATAC  
MK673561.1 GGAAAGTGAAACTAGAAGATGGGCTAAATAC  
MK673560.1 GGAAAGTGAAACTAGAAGATGGGCTAAATAC  
MK673559.1 GGAAAGTGAAACTAGAAGATGGGCTAAATAC  
MK673558.1 GGAAAGTGAAACTAGAAGATGGGCTAAATAC  
KT163249.1 GGAAAGTGAAACTAGAAGATGGGCTAAATAC  
KT163248.1 GGAAAGTGAAACTAGAAGATGGGCTAAATAC  
JN808861.1 GGAGAGTGAAACTAGAAGATGGGCTAAGTAC  
AY858110.1 GGAAAGTGAAACTAGAAGATGGGCTAAATAC  
MK673565.1 GGAGAGTGAAACTAGAAGATGGGCTAAGTAC  
MK673590.1 GGAGAGTGAAACTAGAAGATGGGCTAAGTAC  
MK673589.1 GGAGAGTGAAACTAGAAGATGGGCTAAGTAC  
JN808857.1 GGAGAGTGAAACTAGAAGATGGGCTAAGTAC  
MK673570.1 GGAGAGTGAAACTAGAAGATGGGCTAAGTAC  
MK673564.1 GGAGAGTGAAACTAGAAGATGGGCTAAGTAC  
AY988601.1 GGAGAGTGAAACTAGAAGATGGGCTAAGTAC  
JN808864.1 GGAGAGTGAAACTAGAAGATGGGCTAAGTAC  
MK673583.1 GGAGAGTGAAACTAGAAGATGGGCTAAGTAC  
MK673578.1 GGAGAGTGAAACTAGAAGATGGGCTAAGTAC  
MK673582.1 GGAGAGTGAAACTAGAAGATGGGCTAAGTAC  
MK673577.1 GGAGAGTGAAACTAGAAGATGGGCTAAGTAC  
KT163252.1 GGAGAGTGAAACTAGAAGATGGGCTAAGTAC  
KT163255.1 GGAGAGTGAAACTAGAAGATGGGCTAAGTAC  
KT163254.1 GGAGAGTGAAACTAGAAGATGGGCTAAGTAC  
KT163251.1 GGAGAGTGAAACTAGAAGATGGGCTAAGTAC  
KT163256.1 GGAGAGTGAAACTAGAAGATGGGCTAAGTAC  
FJ513078.1 GGAGAGTGAAACTAGAAGATGGGCTAAGTAC  
NC\_002728.1 GGAAAGTGAAACTAGAAGATGGGCTAAATAC  
KT163250.1 GGAAAGTGAAACTAGAAGATGGGCTAAATAC  
KT163253.1 GGAGAGTGAAACTAGAAGATGGGCTAAGTAC  
JN808858.1 GGAGAGTGAAACTAGAAGATGGGCTAAGTAC  
JN808860.1 GGAGAGTGAAACTAGAAGATGGGCTAAGTAC  
AY029768.1 GGAAAGTGAAACTAGAAGATGGGCTAAATAC  
AY029767.1 GGAAAGTGAAACTAGAAGATGGGCTAAATAC  
AJ627196.1 GGAAAGTGAAACTAGAAGATGGGCTAAATAC  
AJ564623.1 GGAAAGTGAAACTAGAAGATGGGCTAAATAC  
FN869553.1 GGAAAGTGAAACTAGAAGATGGGCTAAATAC  
AJ564622.1 GGAAAGTGAAACTAGAAGATGGGCTAAATAC

R7: \*\*\*\*\* \*\*\*\*\* \*\*\*\*\* \*\*\*\*\*  
GCAGTAGAAATAATCTCAGACATCGGAAAC  
KY425646.1 GCAGTAGAAATAATCTCAGACATCGGAAAC  
KY425655.1 GCAGTAGAAATAATCTCAGACATCGGAAAC  
MK673563.1 GCAGTAGAAATAATCTCAGACATCGGAAAC  
MK673561.1 GCAGTAGAAATAATCTCAGACATCGGAAAC  
MK673560.1 GCAGTAGAAATAATCTCAGACATCGGAAAC  
MK673559.1 GCAGTAGAAATAATCTCAGACATCGGAAAC  
MK673558.1 GCAGTAGAAATAATCTCAGACATCGGAAAC  
KT163249.1 GCAGTAGAAATAATCTCAGACATCGGAAAC  
KT163248.1 GCAGTAGAAATAATCTCAGACATCGGAAAC  
JN808861.1 GCAGTAGAAATAATCTCAGACATCGGAAAC  
AY858110.1 GCAGTAGAAATAATCTCAGACATCGGAAAC  
MK673565.1 GCAGTAGAAATAATCTCAGACATCGGAAAC  
MK673590.1 GCAGTAGAAATAATCTCAGACATCGGAAAC  
MK673589.1 GCAGTAGAAATAATCTCAGACATCGGAAAC  
JN808857.1 GCAGTAGAAATAATCTCAGACATCGGAAAC  
MK673570.1 GCAGTAGAAATAATCTCAGACATCGGAAAC  
MK673564.1 GCAGTAGAAATAATCTCAGACATCGGAAAC  
AY988601.1 GCAGTAGAAATAATCTCAGACATCGGAAAC  
JN808864.1 GCAGTAGAAATAATCTCAGACATCGGAAAC  
MK673583.1 GCAGTAGAAATAATCTCAGACATCGGAAAC  
MK673578.1 GCAGTAGAAATAATCTCAGACATCGGAAAC  
MK673582.1 GCAGTAGAAATAATCTCAGACATCGGAAAC  
MK673577.1 GCAGTAGAAATAATCTCAGACATCGGAAAC  
KT163252.1 GCAGTAGAAATAATCTCAGACATCGGAAAC  
KT163255.1 GCAGTAGAAATAATCTCAGACATCGGAAAC  
KT163254.1 GCAGTAGAAATAATCTCAGACATCGGAAAC  
KT163251.1 GCAGTAGAAATAATCTCAGACATCGGAAAC  
KT163256.1 GCAGTAGAAATAATCTCAGACATCGGAAAC  
FJ513078.1 GCAGTAGAAATAATCTCAGACATCGGAAAC  
NC\_002728.1 GCAGTAGAAATAATCTCAGACATCGGAAAC  
KT163250.1 GCAGTAGAAATAATCTCAGACATCGGAAAC  
KT163253.1 GCAGTAGAAATAATCTCAGACATCGGAAAC  
JN808858.1 GCAGTAGAAATAATCTCAGACATCGGAAAC  
JN808860.1 GCAGTAGAAATAATCTCAGACATCGGAAAC  
AY029768.1 GCAGTAGAAATAATCTCAGACATCGGAAAC  
AY029767.1 GCAGTAGAAATAATCTCAGACATCGGAAAC  
AJ627196.1 GCAGTAGAAATAATCTCAGACATCGGAAAC  
AJ564623.1 GCAGTAGAAATAATCTCAGACATCGGAAAC  
FN869553.1 GCAGTAGAAATAATCTCAGACATCGGAAAC  
AJ564622.1 GCAGTAGAAATAATCTCAGACATCGGAAAC



2. Five candidate crRNAs targeting the conserved regions of *N* gene.

CR1:

|             | CR1: PAM | Spacer sequence      |
|-------------|----------|----------------------|
|             | TTTN     | ACACUCAUCUCUAUGUAUU  |
| KY425646.1  | TTT      | CACACTCATCTCTATGTATT |
| KY425655.1  | TTT      | CACACTCATCTCTATGTATT |
| MK673563.1  | TTT      | CACACTCATCTCTATGTATT |
| MK673561.1  | TTT      | CACACTCATCTCTATGTATT |
| MK673560.1  | TTT      | CACACTCATCTCTATGTATT |
| MK673559.1  | TTT      | CACACTCATCTCTATGTATT |
| MK673558.1  | TTT      | CACACTCATCTCTATGTATT |
| KT163249.1  | TTT      | CACACTCATCTCTATGTATT |
| KT163248.1  | TTT      | CACACTCATCTCTATGTATT |
| JN808861.1  | TTTT     | ACACTCATCTCTATGTATT  |
| AY858110.1  | TTTT     | ACACTCATCTCTATGTATT  |
| MK673565.1  | TTTT     | ACACTCATCTCTATGTATT  |
| MK673590.1  | TTTT     | ACACTCATCTCTATGTATT  |
| MK673589.1  | TTTT     | ACACTCATCTCTATGTATT  |
| JN808857.1  | TTTT     | ACACTCATCTCTATGTATT  |
| MK673570.1  | TTTT     | ACACTCATCTCTATGTATT  |
| MK673564.1  | TTTT     | ACACTCATCTCTATGTATT  |
| AY988601.1  | TTTT     | ACACTCATCTCTATGTATT  |
| JN808864.1  | TTTT     | ACACTCATCTCTATGTATT  |
| MK673583.1  | TTTT     | ACACTCATCTCTATGTATT  |
| MK673578.1  | TTTT     | ACACTCATCTCTATGTATT  |
| MK673582.1  | TTTT     | ACACTCATCTCTATGTATT  |
| MK673577.1  | TTTT     | ACACTCATCTCTATGTATT  |
| KT163252.1  | TTTT     | ACACTCATCTCTATGTATT  |
| KT163255.1  | TTTT     | ACACTCATCTCTATGTATT  |
| KT163254.1  | TTTT     | ACACTCATCTCTATGTATT  |
| KT163251.1  | TTTT     | ACACTCATCTCTATGTATT  |
| KT163256.1  | TTTT     | ACACTCATCTCTATGTATT  |
| FJ513078.1  | TTTT     | ACACTCATCTCTATGTATT  |
| NC_002728.1 | TTT      | CACACTCATCTCTATGTATT |
| KT163250.1  | TTT      | CACACTCATCTCTATGTATT |
| KT163253.1  | TTTT     | ACACTCATCTCTATGTATT  |
| JN808858.1  | TTTT     | ACACTCATCTCTATGTATT  |
| JN808860.1  | TTT      | CACACTCATCTCTATGTATT |
| AY029768.1  | TTT      | CACACTCATCTCTATGTATT |
| AY029767.1  | TTT      | CACACTCATCTCTATGTATT |
| AJ627196.1  | TTT      | CACACTCATCTCTATGTATT |
| AJ564623.1  | TTT      | CACACTCATCTCTATGTATT |
| FN869553.1  | TTT      | CACACTCATCTCTATGTATT |
| AJ564622.1  | TTT      | CACACTCATCTCTATGTATT |

CR2:

|             | CR2: PAM                | Spacer sequence     |
|-------------|-------------------------|---------------------|
|             | TTTN                    | GGAGUUAUCAAUCUAAGUU |
| KY425646.1  | TTTAGGAGTTATCAATCTAAGTT |                     |
| KY425655.1  | TTTAGGAGTTATCAATCTAAGTT |                     |
| MK673563.1  | TTTAGGAGTTATCAATCTAAGTT |                     |
| MK673561.1  | TTTAGGAGTTATCAATCTAAGTT |                     |
| MK673560.1  | TTTAGGAGTTATCAATCTAAGTT |                     |
| MK673559.1  | TTTAGGAGTTATCAATCTAAGTT |                     |
| MK673558.1  | TTTAGGAGTTATCAATCTAAGTT |                     |
| KT163249.1  | TTTAGGAGTTATCAATCTAAGTT |                     |
| KT163248.1  | TTTAGGAGTTATCAATCTAAGTT |                     |
| JN808861.1  | TTTAGGAGTTATCAATCTAAGTT |                     |
| AY858110.1  | TTTAGGAGTTATCAATCTAAGTT |                     |
| MK673565.1  | TTTAGGAGTTATCAATCTAAGTT |                     |
| MK673590.1  | TTTAGGAGTTATCAATCTAAGTT |                     |
| MK673589.1  | TTTAGGAGTTATCAATCTAAGTT |                     |
| JN808857.1  | TTTAGGAGTTATCAATCTAAGTT |                     |
| MK673570.1  | TTTAGGAGTTATCAATCTAAGTT |                     |
| MK673564.1  | TTTAGGAGTTATCAATCTAAGTT |                     |
| AY988601.1  | TTTAGGAGTTATCAATCTAAGTT |                     |
| JN808864.1  | TTTAGGAGTTATCAATCTAAGTT |                     |
| MK673583.1  | TTTAGGAGTTATCAATCTAAGTT |                     |
| MK673578.1  | TTTAGGAGTTATCAATCTAAGTT |                     |
| MK673582.1  | TTTAGGAGTTATCAATCTAAGTT |                     |
| MK673577.1  | TTTAGGAGTTATCAATCTAAGTT |                     |
| KT163252.1  | TTTAGGAGTTATCAATCTAAGTT |                     |
| KT163255.1  | TTTAGGAGTTATCAATCTAAGTT |                     |
| KT163254.1  | TTTAGGAGTTATCAATCTAAGTT |                     |
| KT163251.1  | TTTAGGAGTTATCAATCTAAGTT |                     |
| KT163256.1  | TTTAGGAGTTATCAATCTAAGTT |                     |
| FJ513078.1  | TTTAGGAGTTATCAATCTAAGTT |                     |
| NC_002728.1 | TTTAGGAGTTATCAATCTAAGTT |                     |
| KT163250.1  | TTTAGGAGTTATCAATCTAAGTT |                     |
| KT163253.1  | TTTAGGAGTTATCAATCTAAGTT |                     |
| JN808858.1  | TTTAGGAGTTATCAATCTAAGTT |                     |
| JN808860.1  | TTTAGGAGTTATCAATCTAAGTT |                     |
| AY029768.1  | TTTAGGAGTTATCAATCTAAGTT |                     |
| AY029767.1  | TTTAGGAGTTATCAATCTAAGTT |                     |
| AJ627196.1  | TTTAGGAGTTATCAATCTAAGTT |                     |
| AJ564623.1  | TTTAGGAGTTATCAATCTAAGTT |                     |
| FN869553.1  | TTTAGGAGTTATCAATCTAAGTT |                     |
| AJ564622.1  | TTTAGGAGTTATCAATCTAAGTT |                     |



CR3:

**CR3: PAM** Spacer sequence  
TTTACAACCAAGAUAGGAU

|             |     |   |   |   |   |   |   |   |   |   |   |   |   |   |   |   |   |   |   |   |
|-------------|-----|---|---|---|---|---|---|---|---|---|---|---|---|---|---|---|---|---|---|---|
| KY425646.1  | TTT | G | A | C | A | C | C | A | A | G | A | T | A | A | G | G | A | T | A | T |
| KY425655.1  | TTT | G | A | C | A | C | C | A | A | G | A | T | A | A | G | G | A | T | A | T |
| MK673563.1  | TTT | G | A | C | A | C | C | A | A | G | A | T | A | A | G | G | A | T | A | T |
| MK673561.1  | TTT | G | A | C | A | C | C | A | A | G | A | T | A | A | G | G | A | T | A | T |
| MK673560.1  | TTT | G | A | C | A | C | C | A | A | G | A | T | A | A | G | G | A | T | A | T |
| MK673559.1  | TTT | G | A | C | A | C | C | A | A | G | A | T | A | A | G | G | A | T | A | T |
| MK673558.1  | TTT | G | A | C | A | C | C | A | A | G | A | T | A | A | G | G | A | T | A | T |
| KT163249.1  | TTT | G | A | C | A | C | C | A | A | G | A | T | A | A | G | G | A | T | A | T |
| KT163248.1  | TTT | G | A | C | A | C | C | A | A | G | A | T | A | A | G | G | A | T | A | T |
| JN808861.1  | TTT | G | A | C | A | C | C | A | A | G | A | T | A | A | G | G | A | T | A | T |
| AY858110.1  | TTT | G | A | C | A | C | C | A | A | G | A | T | A | A | G | G | A | T | A | T |
| MK673565.1  | TTT | G | A | C | A | C | C | A | A | G | A | T | A | A | G | G | A | T | A | T |
| MK673590.1  | TTT | G | A | C | A | C | C | A | A | G | A | T | A | A | G | G | A | T | A | T |
| MK673589.1  | TTT | G | A | C | A | C | C | A | A | G | A | T | A | A | G | G | A | T | A | T |
| JN808857.1  | TTT | G | A | C | A | C | C | A | A | G | A | T | A | A | G | G | A | T | A | T |
| MK673570.1  | TTT | G | A | C | A | C | C | A | A | G | A | T | A | A | G | G | A | T | A | T |
| MK673564.1  | TTT | G | A | C | A | C | C | A | A | G | A | T | A | A | G | G | A | T | A | T |
| AY988601.1  | TTT | G | A | C | A | C | C | A | A | G | A | T | A | A | G | G | A | T | A | T |
| JN808864.1  | TTT | G | A | C | A | C | C | A | A | G | A | T | A | A | G | G | A | T | A | T |
| MK673583.1  | TTT | G | A | C | A | C | C | A | A | G | A | T | A | A | G | G | A | T | A | T |
| MK673578.1  | TTT | G | A | C | A | C | C | A | A | G | A | T | A | A | G | G | A | T | A | T |
| MK673582.1  | TTT | G | A | C | A | C | C | A | A | G | A | T | A | A | G | G | A | T | A | T |
| MK673577.1  | TTT | G | A | C | A | C | C | A | A | G | A | T | A | A | G | G | A | T | A | T |
| KT163252.1  | TTT | G | A | C | A | C | C | A | A | G | A | T | A | A | G | G | A | T | A | T |
| KT163255.1  | TTT | G | A | C | A | C | C | A | A | G | A | T | A | A | G | G | A | T | A | T |
| KT163254.1  | TTT | G | A | C | A | C | C | A | A | G | A | T | A | A | G | G | A | T | A | T |
| KT163251.1  | TTT | G | A | C | A | C | C | A | A | G | A | T | A | A | G | G | A | T | A | T |
| KT163256.1  | TTT | G | A | C | A | C | C | A | A | G | A | T | A | A | G | G | A | T | A | T |
| FJ513078.1  | TTT | G | A | C | A | C | C | A | A | G | A | T | A | A | G | G | A | T | A | T |
| NC_002728.1 | TTT | G | A | C | A | C | C | A | A | G | A | T | A | A | G | G | A | T | A | T |
| KT163250.1  | TTT | G | A | C | A | C | C | A | A | G | A | T | A | A | G | G | A | T | A | T |
| KT163253.1  | TTT | G | A | C | A | C | C | A | A | G | A | T | A | A | G | G | A | T | A | T |
| JN808858.1  | TTT | G | A | C | A | C | C | A | A | G | A | T | A | A | G | G | A | T | A | T |
| JN808860.1  | TTT | G | A | C | A | C | C | A | A | G | A | T | A | A | G | G | A | T | A | T |
| AY029768.1  | TTT | G | A | C | A | C | C | A | A | G | A | T | A | A | G | G | A | T | A | T |
| AY029767.1  | TTT | G | A | C | A | C | C | A | A | G | A | T | A | A | G | G | A | T | A | T |
| AJ627196.1  | TTT | G | A | C | A | C | C | A | A | G | A | T | A | A | G | G | A | T | A | T |
| AJ564623.1  | TTT | G | A | C | A | C | C | A | A | G | A | T | A | A | G | G | A | T | A | T |
| FN869553.1  | TTT | G | A | C | A | C | C | A | A | G | A | T | A | A | G | G | A | T | A | T |
| AJ564622.1  | TTT | G | A | C | A | C | C | A | A | G | A | T | A | A | G | G | A | T | A | T |

CR4:

**CR4:** PAM Spacer sequence  
TTN CUGCAGGAGGUGUCUCAU

|             |     |       |     |     |     |        |
|-------------|-----|-------|-----|-----|-----|--------|
| KY425646.1  | TTT | GCTGC | AGG | AGG | TGT | GCTCAT |
| KY425655.1  | TTT | GCTGC | AGG | AGG | TGT | GCTCAT |
| MK673563.1  | TTT | GCTGC | AGG | AGG | TGT | GCTCAT |
| MK673561.1  | TTT | GCTGC | AGG | AGG | TGT | GCTCAT |
| MK673560.1  | TTT | GCTGC | AGG | AGG | TGT | GCTCAT |
| MK673559.1  | TTT | GCTGC | AGG | AGG | TGT | GCTCAT |
| MK673558.1  | TTT | GCTGC | AGG | AGG | TGT | GCTCAT |
| KT163249.1  | TTT | GCTGC | AGG | AGG | TGT | GCTCAT |
| KT163248.1  | TTT | GCTGC | AGG | AGG | TGT | GCTCAT |
| JN808861.1  | TTT | GCTGC | AGG | AGG | TGT | GCTCAT |
| AY858110.1  | TTT | GCTGC | AGG | AGG | TGT | GCTCAT |
| MK673565.1  | TTT | GCTGC | AGG | AGG | TGT | GCTCAT |
| MK673590.1  | TTT | GCTGC | AGG | AGG | TGT | GCTCAT |
| MK673589.1  | TTT | GCTGC | AGG | AGG | TGT | GCTCAT |
| JN808857.1  | TTT | GCTGC | AGG | AGG | TGT | GCTCAT |
| MK673570.1  | TTT | GCTGC | AGG | AGG | TGT | GCTCAT |
| MK673564.1  | TTT | GCTGC | AGG | AGG | TGT | GCTCAT |
| AY988601.1  | TTT | GCTGC | AGG | AGG | TGT | GCTCAT |
| JN808864.1  | TTT | GCTGC | AGG | AGG | TGT | GCTCAT |
| MK673583.1  | TTT | GCTGC | AGG | AGG | TGT | GCTCAT |
| MK673578.1  | TTT | GCTGC | AGG | AGG | TGT | GCTCAT |
| MK673582.1  | TTT | GCTGC | AGG | AGG | TGT | GCTCAT |
| MK673577.1  | TTT | GCTGC | AGG | AGG | TGT | GCTCAT |
| KT163252.1  | TTT | GCTGC | AGG | AGG | TGT | GCTCAT |
| KT163255.1  | TTT | GCTGC | AGG | AGG | TGT | GCTCAT |
| KT163254.1  | TTT | GCTGC | AGG | AGG | TGT | GCTCAT |
| KT163251.1  | TTT | GCTGC | AGG | AGG | TGT | GCTCAT |
| KT163256.1  | TTT | GCTGC | AGG | AGG | TGT | GCTCAT |
| FJ513078.1  | TTT | GCTGC | AGG | AGG | TGT | GCTCAT |
| NC_002728.1 | TTT | GCTGC | AGG | AGG | TGT | GCTCAT |
| KT163250.1  | TTT | GCTGC | AGG | AGG | TGT | GCTCAT |
| KT163253.1  | TTT | GCTGC | AGG | AGG | TGT | GCTCAT |
| JN808858.1  | TTT | GCTGC | AGG | AGG | TGT | GCTCAT |
| JN808860.1  | TTT | GCTGC | AGG | AGG | TGT | GCTCAT |
| AY029768.1  | TTT | GCTGC | AGG | AGG | TGT | GCTCAT |
| AY029767.1  | TTT | GCTGC | AGG | AGG | TGT | GCTCAT |
| AJ627196.1  | TTT | GCTGC | AGG | AGG | TGT | GCTCAT |
| AJ564623.1  | TTT | GCTGC | AGG | AGG | TGT | GCTCAT |
| FN869553.1  | TTT | GCTGC | AGG | AGG | TGT | GCTCAT |
| AJ564622.1  | TTT | GCTGC | AGG | AGG | TGT | GCTCAT |



CR5:

|             | CR5: | Spacer sequence     | PAM     |
|-------------|------|---------------------|---------|
|             |      | AGUUCUUUCCUCCUAGACG | NTTT    |
| KY425646.1  | T    | CAAGAAAGGAGGATC     | TGCTAAA |
| KY425655.1  | T    | CAAGAAAGGAGGATC     | TGCTAAA |
| MK673563.1  | T    | CAAGAAAGGAGGATC     | TGCTAAA |
| MK673561.1  | T    | CAAGAAAGGAGGATC     | TGCTAAA |
| MK673560.1  | T    | CAAGAAAGGAGGATC     | TGCTAAA |
| MK673559.1  | T    | CAAGAAAGGAGGATC     | TGCTAAA |
| MK673558.1  | T    | CAAGAAAGGAGGATC     | TGCTAAA |
| KT163249.1  | T    | CAAGAAAGGAGGATC     | TGCTAAA |
| KT163248.1  | T    | CAAGAAAGGAGGATC     | TGCTAAA |
| JN808861.1  | T    | CAAGAAAGGAGGATC     | TGCTAAA |
| AY858110.1  | T    | CAAGAAAGGAGGATC     | TGCTAAA |
| MK673565.1  | T    | CAAGAAAGGAGGATC     | TGCTAAA |
| MK673590.1  | T    | CAAGAAAGGAGGATC     | TGCTAAA |
| MK673589.1  | T    | CAAGAAAGGAGGATC     | TGCTAAA |
| JN808857.1  | T    | CAAGAAAGGAGGATC     | TGCTAAA |
| MK673570.1  | T    | CAAGAAAGGAGGATC     | TGCTAAA |
| MK673564.1  | T    | CAAGAAAGGAGGATC     | TGCTAAA |
| AY988601.1  | T    | CAAGAAAGGAGGATC     | TGCTAAA |
| JN808864.1  | T    | CAAGAAAGGAGGATC     | TGCTAAA |
| MK673583.1  | T    | CAAGAAAGGAGGATC     | TGCTAAA |
| MK673578.1  | T    | CAAGAAAGGAGGATC     | TGCTAAA |
| MK673582.1  | T    | CAAGAAAGGAGGATC     | TGCTAAA |
| MK673577.1  | T    | CAAGAAAGGAGGATC     | TGCTAAA |
| KT163252.1  | T    | CAAGAAAGGAGGATC     | TGCTAAA |
| KT163255.1  | T    | CAAGAAAGGAGGATC     | TGCTAAA |
| KT163254.1  | T    | CAAGAAAGGAGGATC     | TGCTAAA |
| KT163251.1  | T    | CAAGAAAGGAGGATC     | TGCTAAA |
| KT163256.1  | T    | CAAGAAAGGAGGATC     | TGCTAAA |
| FJ513078.1  | T    | CAAGAAAGGAGGATC     | TGCTAAA |
| NC_002728.1 | T    | CAAGAAAGGAGGATC     | TGCTAAA |
| KT163250.1  | T    | CAAGAAAGGAGGATC     | TGCTAAA |
| KT163253.1  | T    | CAAGAAAGGAGGATC     | TGCTAAA |
| JN808858.1  | T    | CAAGAAAGGAGGATC     | TGCTAAA |
| JN808860.1  | T    | CAAGAAAGGAGGATC     | TGCTAAA |
| AY029768.1  | T    | CAAGAAAGGAGGATC     | TGCTAAA |
| AY029767.1  | T    | CAAGAAAGGAGGATC     | TGCTAAA |
| AJ627196.1  | T    | CAAGAAAGGAGGATC     | TGCTAAA |
| AJ564623.1  | T    | CAAGAAAGGAGGATC     | TGCTAAA |
| FN869553.1  | T    | CAAGAAAGGAGGATC     | TGCTAAA |
| AJ564622.1  | T    | CAAGAAAGGAGGATC     | TGCTAAA |

**Table S1.** RAA primer pairs used in this study.

| Primer | Sequence (5'-3')                   | Product size |
|--------|------------------------------------|--------------|
| F1     | ATGAGTGATATCTTTGAAGAGGGCGGCTAGT    | 325          |
| R1     | TGACCATTGATCCAACATCTATTATTACAGCTTC |              |
| F2     | TAGGAGTTATCAATCTAAGTTAGGGAGAGATG   | 291          |
| R2     | ACCATTGATCCAACATCTATTATTACAGCTTC   |              |
| F3     | GGAGTTATCAATCTAAGTTAGGGAGAGATG     | 213          |
| R3     | TCTCTGAATACATAGAGATGAGTGTGAAAG     |              |
| F4     | CAAATAGACTGGGACTAAGTTCAGATCAAG     | 225          |
| R4     | ATGAAATACTCATCTCCCTTTGAAGGTAA      |              |
| F5     | GAGGAATTGATCAGAACATGGCAAATAGAC     | 245          |
| R5     | TGAAATACTCATCTCCCTTTGAAGGTAAC      |              |
| F6     | GAAAGTGAAACTAGAAGATGGGCTAAATAC     | 212          |
| R6     | TAGTTTCCGATGTCTGAGATTATTTCTACT     |              |
| F7     | GGAAAGTGAAACTAGAAGATGGGCTAAATAC    | 211          |
| R7     | GTTTCCGATGTCTGAGATTATTTCTACTGC     |              |

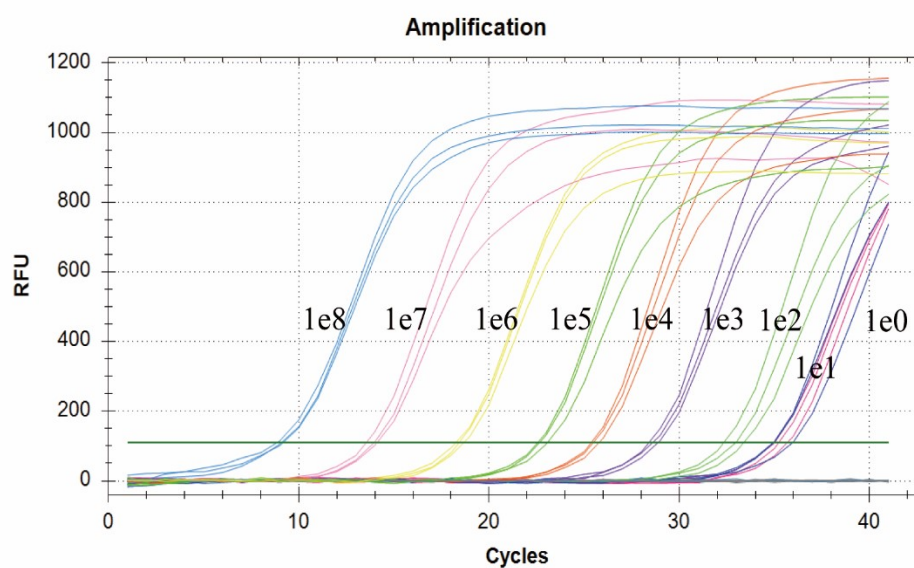

**Figure S1.** The sensitivity of the qPCR assay in NiV detection. qPCR was conducted with the CFX96 real-time PCR detection systems, and the amplification curves of each sample were shown in this figure.
